# Supplementary material for: Selective topotecan delivery to cancer cells by targeted pH-sensitive mesoporous silica nanoparticles
Source: Royal Society of Chemistry journal article supplement (doi:10.1039/c6ra07763c), 2016-01-01
Supplement: c6ra07763c1.pdf [file c6ra07763c1.pdf]

## ELECTRONIC SUPPORTING INFORMATION

RSC Advances

### SELECTIVE TOPOTECAN DELIVERY TO CANCER CELLS BY TARGETED pH-SENSITIVE MESOPOROUS SILICA NANOPARTICLES

Marina Martínez-Carmona, Daniel Lozano, Montserrat Colilla, Maria Vallet-Regí\*

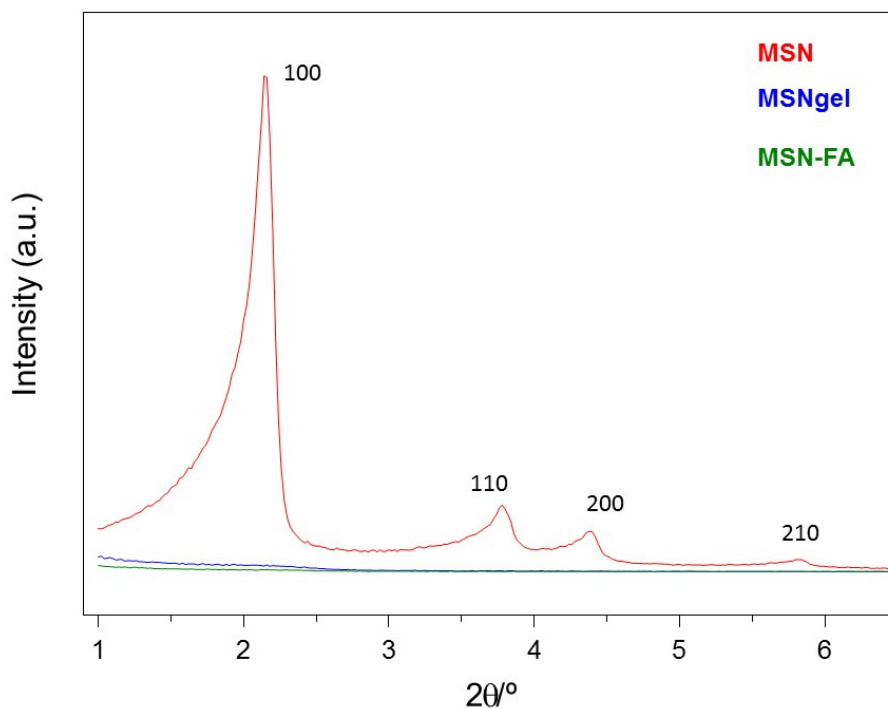

**Figure S1.** Low-angle XRD patterns of the different nanomaterials synthesized in this work.

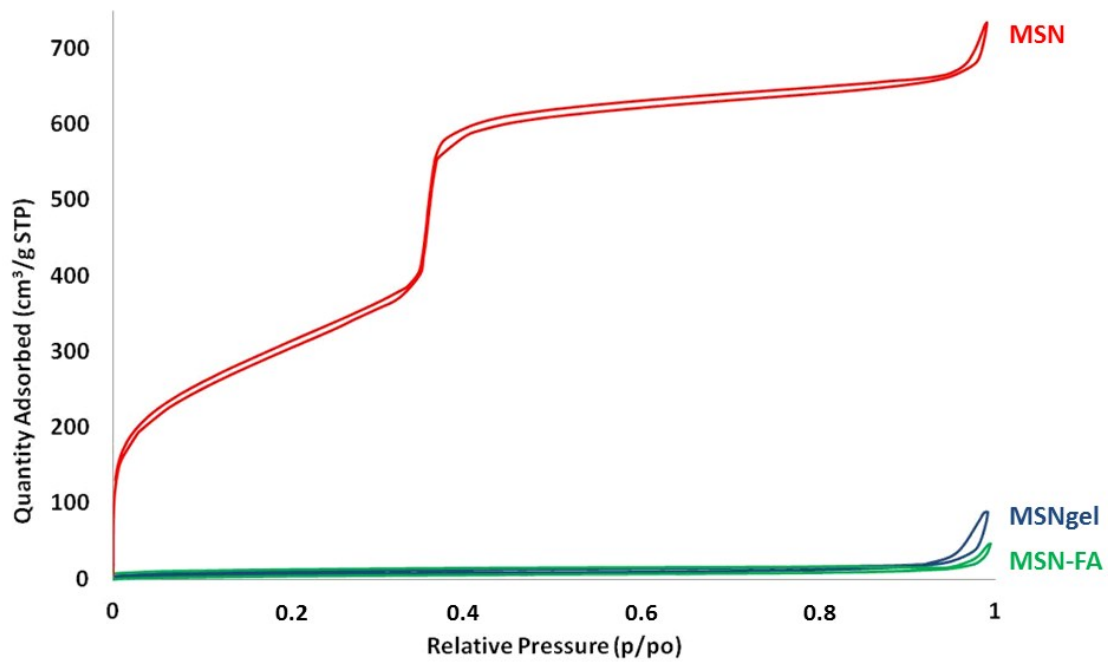

**Figure S2.** N<sub>2</sub> adsorption and desorption isotherms of the different nanomaterials synthesized in this work.

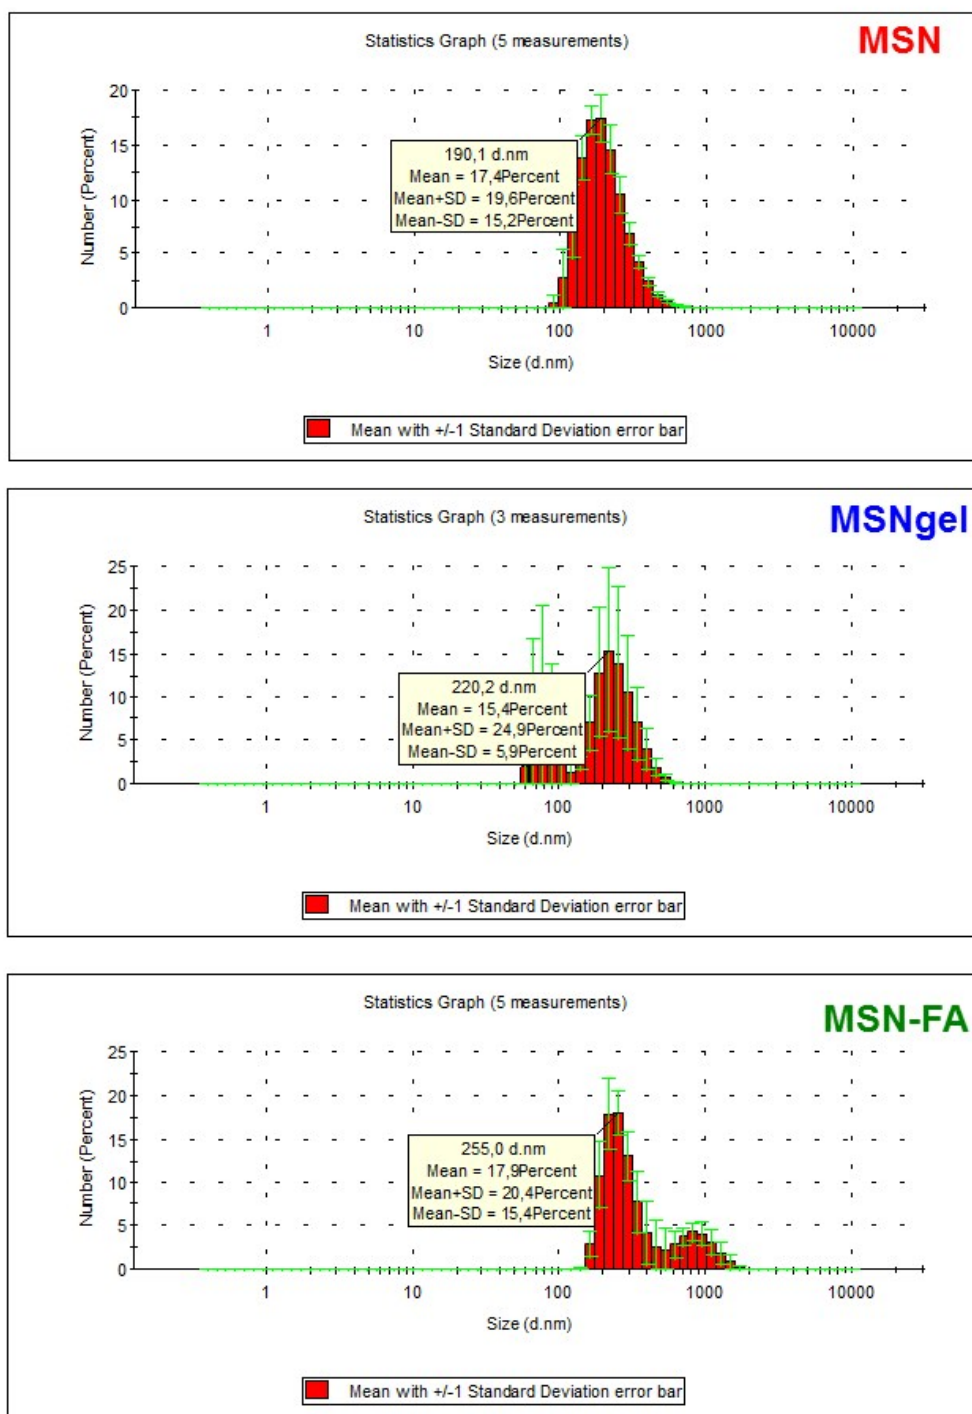

**Figure S3.** DLS measurements and mean hydrodynamic diameter for the different materials synthesized in this work.

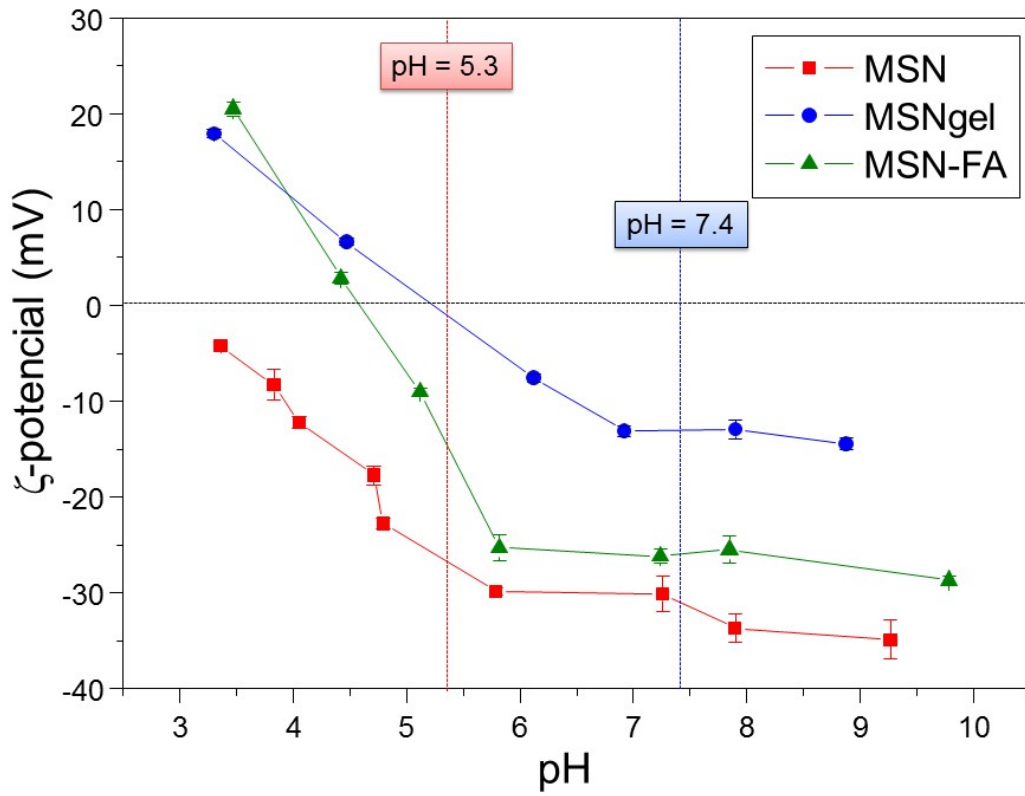

**Figure S4.**  $\zeta$ -Potential vs pH plots of the different samples synthesized in this work.

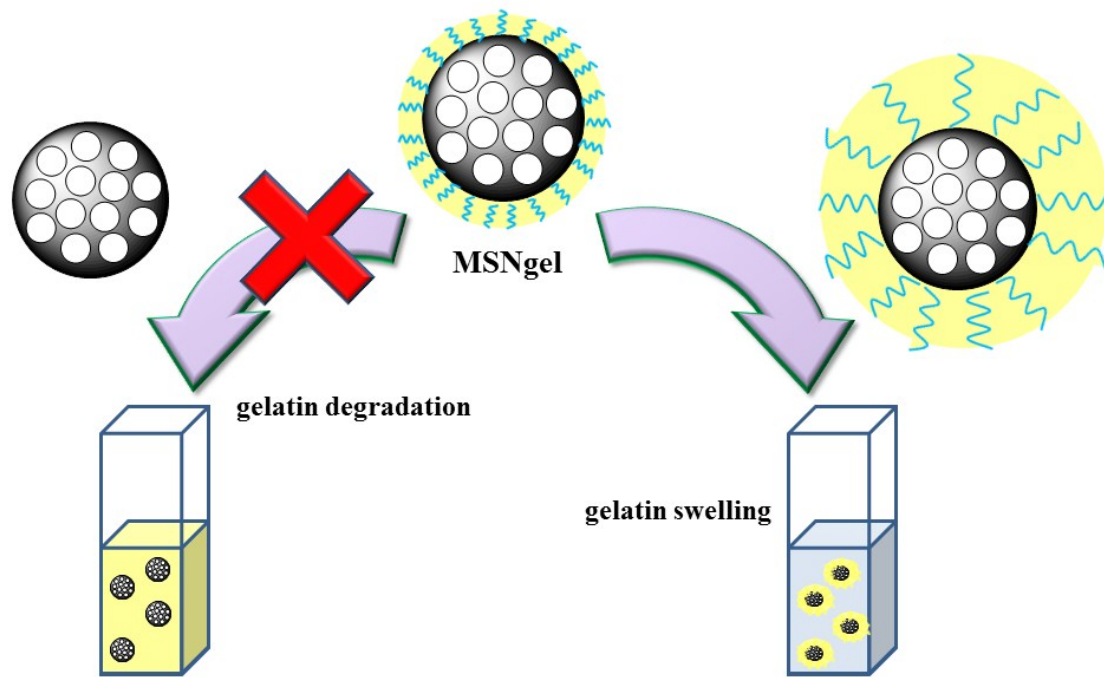

**Figure S5.** Schematic depiction of the possible performance of MSNgel nanosystems in aqueous media.

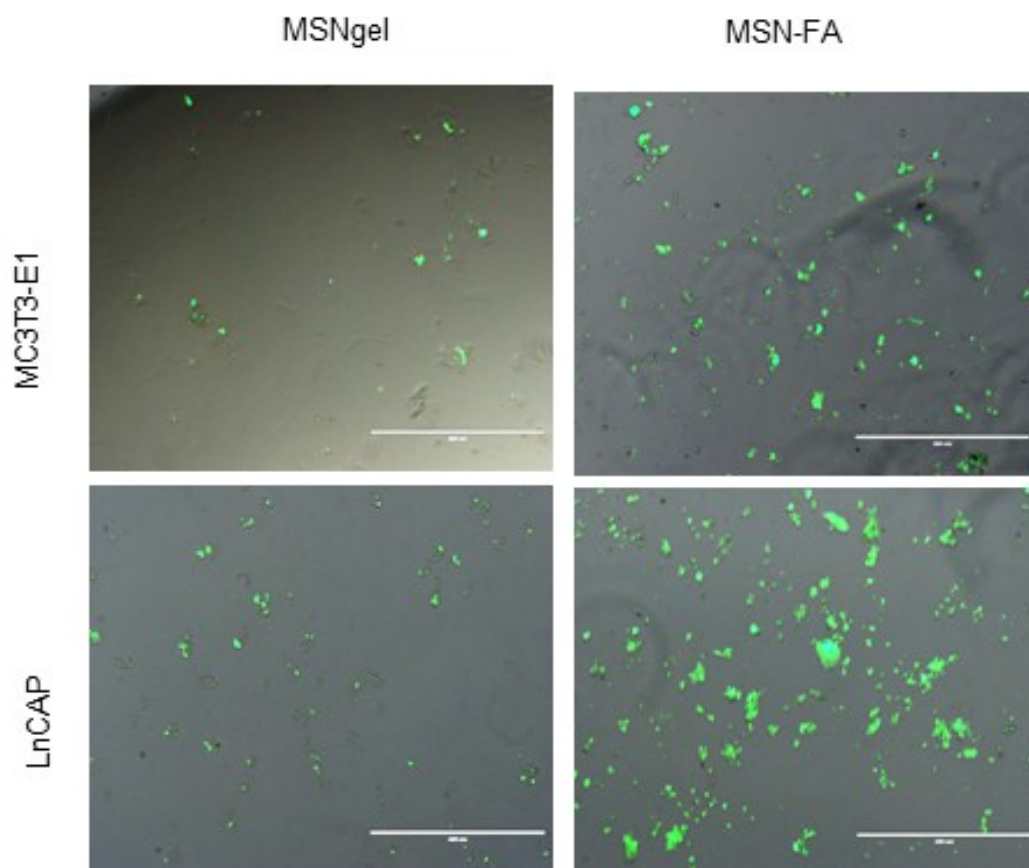

**Figure S6.** Fluorescence microscopy images of MC3T3-E1 and LNCaP cells in contact with 100 µg/ml of MSNgel and MSN-FA at 2 hours of cell culture.

**Table S1.** Kinetic parameters corresponding to TOP release from different matrices (MSN-FA and MSN) at two different pH values (5.3 and 7.4).

| <b>Material</b> | <b>pH</b> | <b>A(%)</b> | <b>k (h<sup>-1</sup>)</b> | <b>δ</b>    | <b>R<sup>2</sup></b> |
|-----------------|-----------|-------------|---------------------------|-------------|----------------------|
| MSN-FA          | 5.3       | 8.8 ± 0.2   | 0.07 ± 0.01               | 0.51 ± 0.03 | 0.998                |
| MSN-FA          | 7.4       | 3.4 ± 0.4   | 0.03 ± 0.02               | 0.47 ± 0.06 | 0.993                |
| MSN             | 5.3       | 70 ± 1      | 0.003 ± 0.004             | 0.76 ± 0.03 | 0.999                |
| MSN             | 7.4       | 98 ± 1      | 0.025 ± 0.001             | 0.70 ± 0.03 | 0.998                |
